# Supplementary material for: Generating tertiary protein structures via interpretable graph variational autoencoders
Source: PubMed Central journal article supplement (PMC9710582; doi:10.1093/bioadv/vbab036), 2021-11-29
Supplement: vbab036_supplementary_data.pdf [file vbab036_supplementary_data.pdf]

## Supplementary Data

### Architecture and Training Parameters

We describe the detailed operation and implementation of the encoder and decoder in the comparison methods: VGAE, Graphite and GraphRNN. VGAE parameterizes VAEs with graph neural networks and uses a novel iterative graph refinement strategy inspired by low-rank approximations for decoding. GraphRNN learns to generate graphs by training on a representative set of graphs and decomposes the graph generation process into a sequence of node and edge formations, conditioned on the graph structure generated so far. We summarize the training parameters and architecture information of VGAE and Graphite for reproducibility below. The neural network layer is described in the format of  $\langle LayerType \rangle \cdot \langle Num\_hiddens \rangle$ . The GraphRNN model is the same as that provided in arXiv preprint arXiv:1802.08773. The WGAN model is the same as the one provided in (Rahman et al. 2021). The learning rate to train the deep neural network model for all the comparison models is  $5 \times 10^{-4}$ ; the mini-batch is 100 and the number of epochs is 200. Codes for all the utilized neural network layers can be found at: <https://github.com/tkipf/gae> (VGAE), <https://github.com/ermongroup/graphite> (Graphite), and <https://github.com/JiaxuanYou/graph-generation> (GraphRNN).

**Table 1.** Training parameters, encoder, and decoder architecture.  $N$  refers to the number of amino acids.

| VGAE                                                                      |                                         | Graphite                                                                  |                                         |
|---------------------------------------------------------------------------|-----------------------------------------|---------------------------------------------------------------------------|-----------------------------------------|
| Graph encoder                                                             | Graph decoder                           | Graph encoder                                                             | Graph decoder                           |
| Input: $F \in \mathbb{R}^{N \times 16}$ , $A \in \mathbb{R}^{N \times N}$ | Input: $z \in \mathbb{R}^{N \times 20}$ | Input: $F \in \mathbb{R}^{N \times 16}$ , $A \in \mathbb{R}^{N \times N}$ | Input: $z \in \mathbb{R}^{N \times 20}$ |
| Graph-conv.10 ReLU                                                        | InnerProduct Layer                      | Graph-conv.10 ReLU                                                        | Graphite Layer.10                       |
| Graph-conv.10 ReLU                                                        |                                         | Graph-conv.10 ReLU                                                        | InnerProduct Layer                      |

  

| CO-VAE & DECO-VAE                                                         |                                         |
|---------------------------------------------------------------------------|-----------------------------------------|
| Graph encoder                                                             | Graph decoder                           |
| Input: $F \in \mathbb{R}^{N \times 16}$ , $A \in \mathbb{R}^{N \times N}$ | Input: $z \in \mathbb{R}^{20}$          |
| $2 \times 2$ Edge-conv.10 ReLU. s. 1                                      | FC.20 $\cdot N$                         |
| $2 \times 2$ Edge-conv.5 ReLU. s. 1                                       | $N \times 1$ Node-deconv.4 ReLU. s. 1   |
| Graph-conv.4 ReLU                                                         | $N \times 1$ Edge-deconv.5 ReLU. s. 1   |
| FC.20                                                                     | $20 \times 1$ Edge-deconv.10 ReLU. s. 1 |

### Further Evaluation

Supplementary Fig. 1 compares the five models excluding WGAN across the four intrinsic graph properties described in the main manuscript. Supplementary Table 2 provides the actual values and includes the PCC- and EMD-based comparison.

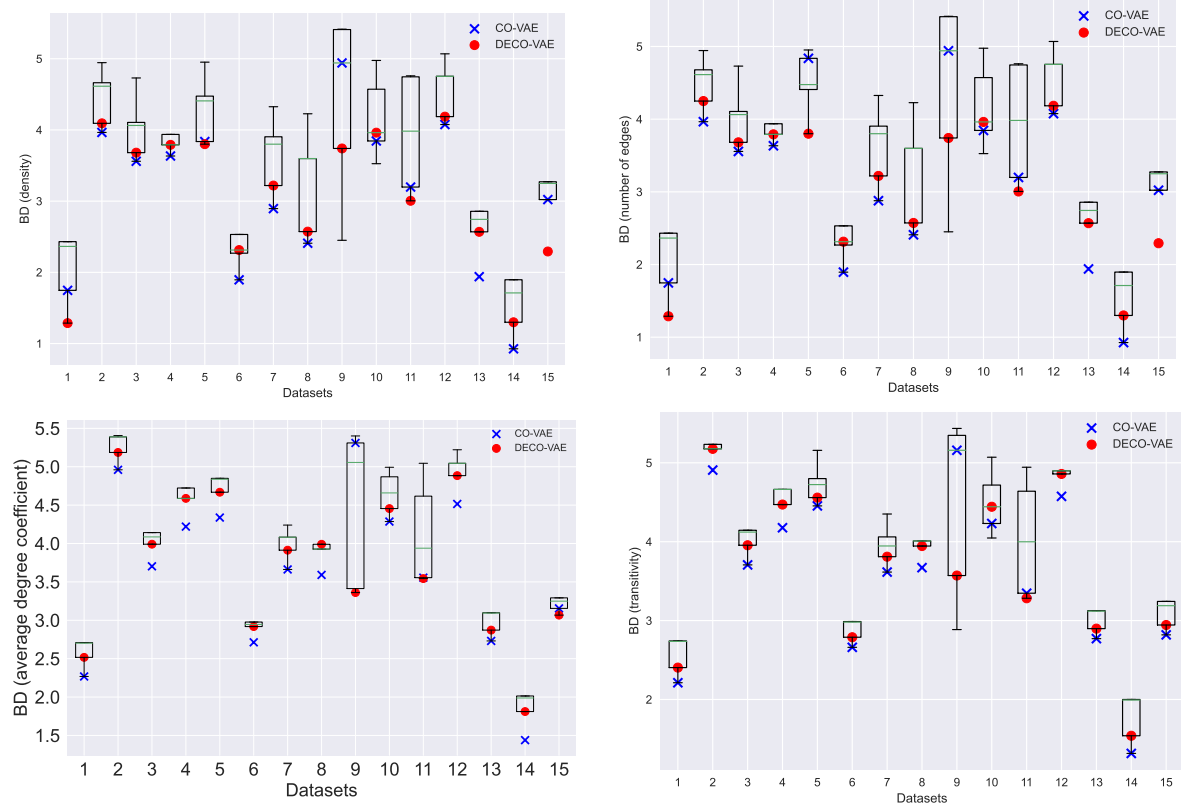

**Fig. 1.** Generated graphs are compared to the ones in the training dataset on four graph properties. BD measures the distance between distributions. Boxplots show the range of BD values over five models. Annotations denote CO-VAE and DECO-VAE.

**Table 2.** Comparison of learned distributions (on each of the four graph properties of interest, listed in the rows) by their distance (according to PCC, BD, and EMD) to the training dataset for different proteins. The lowest BD and EMD values on each of the four graph properties of interest are highlighted in bold font.

|              | Graph Property | Methods      | PCC          | BD           | EMD          |
|--------------|----------------|--------------|--------------|--------------|--------------|
|              | D 1            | Density      | Graphite     | <b>0.062</b> | 2.431        |
| GVAE         |                |              | 0.023        | 2.364        | 0.384        |
| GraphRNN     |                |              | 0.053        | 3.801        | 0.013        |
| WGAN         |                |              | 0.000        | 4.880        | 0.004        |
| CO-VAE       |                |              | 0.008        | 1.747        | <b>0.002</b> |
| DECO-VAE     |                |              | 0.051        | <b>1.287</b> | <b>0.002</b> |
| N Edges      |                | Graphite     | <b>0.062</b> | 2.431        | 549.203      |
|              |                | GVAE         | 0.023        | 2.364        | 549.940      |
|              |                | GraphRNN     | 0.053        | 3.801        | 18.021       |
|              |                | WGAN         | 0.000        | 12.108       | 5.931        |
|              |                | CO-VAE       | 0.008        | 1.747        | <b>2.278</b> |
|              |                | DECO-VAE     | 0.051        | <b>1.288</b> | <b>2.290</b> |
| Avg-Deg-Cor  |                | Graphite     | 0.014        | 2.709        | 0.045        |
|              |                | GVAE         | 0.040        | 2.702        | 0.047        |
|              |                | GraphRNN     | 0.022        | 4.116        | 0.127        |
|              |                | WGAN         | 0.000        | 6.194        | 0.026        |
|              |                | CO-VAE       | <b>0.059</b> | 2.268        | 0.017        |
|              |                | DECO-VAE     | 0.016        | <b>2.517</b> | <b>0.010</b> |
| Transitivity |                | Graphite     | 0.001        | 2.736        | 0.090        |
|              |                | GVAE         | 0.022        | 2.742        | 0.090        |
|              | GraphRNN       | 0.063        | 4.124        | 0.240        |              |
|              | WGAN           | 0.000        | 6.069        | 0.047        |              |
|              | CO-VAE         | <b>0.069</b> | <b>2.212</b> | <b>0.003</b> |              |
|              | DECO-VAE       | 0.023        | 2.404        | 0.004        |              |
| D 2          | Density        | Graphite     | 0.010        | 4.663        | 0.386        |
|              |                | GVAE         | 0.000        | 4.614        | 0.386        |
|              |                | GraphRNN     | 0.011        | 4.945        | 0.009        |
|              |                | WGAN         | 0.000        | 7.410        | 0.002        |
|              |                | CO-VAE       | <b>0.018</b> | <b>3.965</b> | 0.001        |
|              |                | DECO-VAE     | 0.010        | 4.093        | <b>0.000</b> |
|              | N Edges        | Graphite     | 0.010        | 4.679        | 706.323      |
|              |                | GVAE         | 0.000        | 4.613        | 706.720      |
|              |                | GraphRNN     | 0.011        | 4.944        | 16.698       |
|              |                | WGAN         | 0.000        | 14.922       | 4.260        |
|              |                | CO-VAE       | <b>0.018</b> | <b>3.965</b> | 1.703        |
|              |                | DECO-VAE     | 0.010        | 4.249        | <b>0.801</b> |
|              | Avg-Deg-Cor    | Graphite     | 0.008        | 5.389        | 0.090        |
|              |                | GVAE         | 0.020        | 5.389        | 0.089        |
|              |                | GraphRNN     | 0.003        | 5.406        | 0.149        |
|              |                | WGAN         | 0.000        | 8.772        | 0.011        |
|              |                | CO-VAE       | <b>0.024</b> | <b>4.960</b> | <b>0.003</b> |
|              |                | DECO-VAE     | 0.007        | 5.186        | 0.007        |
|              | Transitivity   | Graphite     | 0.003        | 5.178        | 0.093        |
|              |                | GVAE         | 0.019        | 5.234        | 0.093        |
| GraphRNN     |                | 0.006        | 5.421        | 0.254        |              |
| WGAN         |                | 0.000        | 8.630        | 0.035        |              |
| CO-VAE       |                | 0.003        | <b>4.908</b> | <b>0.002</b> |              |
| DECO-VAE     |                | <b>0.012</b> | 5.177        | <b>0.002</b> |              |
| D 3          | Density        | Graphite     | <b>0.015</b> | 4.063        | 0.401        |
|              |                | GVAE         | 0.011        | 4.106        | 0.400        |
|              |                | GraphRNN     | 0.004        | 4.730        | <b>0.003</b> |
|              |                | WGAN         | 0.000        | 7.094        | 0.781        |
|              |                | CO-VAE       | 0.007        | <b>3.560</b> | 0.036        |
|              |                | DECO-VAE     | 0.011        | 3.681        | 0.038        |
|              | N Edges        | Graphite     | <b>0.015</b> | 4.063        | 758.513      |
|              |                | GVAE         | 0.011        | 4.106        | 756.483      |
|              |                | GraphRNN     | 0.004        | 4.730        | <b>5.640</b> |
|              |                | WGAN         | 0.000        | 14.639       | 1477.466     |
|              |                | CO-VAE       | 0.007        | <b>3.556</b> | 67.921       |
|              |                | DECO-VAE     | 0.011        | 3.681        | 72.522       |
|              | Avg-Deg-Cor    | Graphite     | 0.009        | 4.086        | 0.131        |
|              |                | GVAE         | 0.008        | 4.142        | 0.131        |
|              |                | GraphRNN     | 0.006        | 4.760        | 0.179        |
|              |                | WGAN         | 0.000        | 7.776        | 0.346        |
|              |                | CO-VAE       | 0.027        | <b>3.703</b> | <b>0.036</b> |
|              |                | DECO-VAE     | <b>0.040</b> | 3.991        | 0.063        |
|              | Transitivity   | Graphite     | 0.021        | 4.145        | 0.089        |
|              |                | GVAE         | 0.017        | 4.122        | 0.089        |
| GraphRNN     |                | 0.005        | 4.799        | 0.292        |              |
| WGAN         |                | 0.000        | 7.712        | 0.399        |              |
| CO-VAE       |                | 0.000        | <b>3.706</b> | <b>0.049</b> |              |
| DECO-VAE     |                | <b>0.034</b> | 3.955        | 0.050        |              |
| D 4          | Density        | Graphite     | 0.011        | 3.937        | 0.392        |
|              |                | GVAE         | 0.011        | 3.937        | 0.392        |
|              |                | GraphRNN     | 0.023        | 3.791        | 0.003        |
|              |                | WGAN         | 0.000        | 6.658        | 0.008        |
|              |                | CO-VAE       | 0.021        | <b>3.634</b> | <b>0.001</b> |
|              |                | DECO-VAE     | <b>0.024</b> | 3.791        | <b>0.001</b> |
|              | N Edges        | Graphite     | 0.011        | 3.937        | 789.502      |
|              |                | GVAE         | 0.011        | 3.937        | 789.500      |
|              |                | GraphRNN     | 0.023        | 3.791        | 1.286        |
|              |                | WGAN         | 0.000        | 14.267       | 15.833       |
|              |                | CO-VAE       | 0.021        | <b>3.634</b> | 3.015        |
|              |                | DECO-VAE     | <b>0.024</b> | 3.791        | <b>1.187</b> |
|              | Avg-Deg-Cor    | Graphite     | <b>0.014</b> | 4.723        | 0.119        |
|              |                | GVAE         | <b>0.014</b> | 4.723        | 0.119        |
|              |                | GraphRNN     | 0.002        | 4.587        | 0.019        |
|              |                | WGAN         | 0.000        | 8.155        | 0.035        |
|              |                | CO-VAE       | 0.005        | <b>4.220</b> | <b>0.006</b> |
|              |                | DECO-VAE     | 0.002        | 4.588        | 0.019        |
|              | Transitivity   | Graphite     | 0.010        | 4.663        | 0.088        |
|              |                | GVAE         | 0.010        | 4.663        | 0.088        |
| GraphRNN     |                | 0.020        | 5.671        | 0.074        |              |
| WGAN         |                | 0.000        | 8.009        | 0.047        |              |
| CO-VAE       |                | 0.010        | <b>4.177</b> | 0.006        |              |
| DECO-VAE     |                | <b>0.025</b> | 4.471        | <b>0.004</b> |              |

Based on the results in the main manuscripts, we exclude GAN from this supplementary analysis. The top panel of Fig. 2 shows  $\langle \text{NAT-C} \rangle$ , the average NAT-C, and  $\langle \text{NONNAT-C} \rangle$ , the average NONNAT-C, over generated contact graphs for each of the five models. The bottom panel focuses on CO-VAE and DECO-VAE. Table 3 lists the actual values for each metric for each model.

The distribution of NAT-C and NONNAT-C values over the training dataset are compared visually to the corresponding distributions over the data generated by DECO-VAE on three selected target proteins in Fig. 3.

**Table 2.** (Continued) Comparison of learned distributions (on each of the four graph properties of interest, listed in the rows) by their distance (according to PCC, BD, and EMD) to the training dataset for different proteins. The lowest BD and EMD values on each of the four graph properties of interest are highlighted in bold font.

|              | Graph Property | Methods  | PCC          | BD           | EMD           |
|--------------|----------------|----------|--------------|--------------|---------------|
|              | D 5            | Density  | Graphite     | 0.005        | 4.475         |
| GVAE         |                |          | 0.018        | 4.408        | 0.404         |
| GraphRNN     |                |          | 0.008        | 4.952        | 0.163         |
| WGAN         |                |          | 0.000        | 6.788        | 0.021         |
| CO-VAE       |                |          | 0.008        | 3.837        | <b>0.004</b>  |
| DECO-VAE     |                |          | <b>0.028</b> | <b>3.800</b> | 0.006         |
| N Edges      |                | Graphite | 0.005        | 4.4758       | 1033.676      |
|              |                | GVAE     | 0.018        | 4.408        | 1033.120      |
|              |                | GraphRNN | 0.008        | 4.952        | 416.697       |
|              |                | WGAN     | 0.000        | 14.397       | 42.555        |
|              |                | CO-VAE   | 0.008        | 3.837        | <b>11.160</b> |
|              |                | DECO-VAE | <b>0.028</b> | <b>3.800</b> | 16.085        |
| Avg-Deg-Cor  |                | Graphite | 0.005        | 4.837        | 0.142         |
|              |                | GVAE     | <b>0.011</b> | 4.849        | 0.141         |
|              |                | GraphRNN | 0.009        | 5.162        | 0.322         |
|              |                | WGAN     | 0.000        | 8.260        | <b>0.060</b>  |
|              |                | CO-VAE   | 0.003        | <b>4.338</b> | 0.064         |
|              |                | DECO-VAE | 0.008        | 4.668        | 0.079         |
| Transitivity |                | Graphite | 0.026        | 4.800        | 0.092         |
|              |                | GVAE     | 0.027        | 4.724        | 0.092         |
|              |                | GraphRNN | <b>0.028</b> | 5.158        | 0.204         |
|              |                | WGAN     | 0.000        | 8.143        | 0.047         |
|              |                | CO-VAE   | 0.020        | <b>4.454</b> | <b>0.004</b>  |
|              |                | DECO-VAE | 0.004        | 4.559        | 0.005         |
| D 6          | Density        | Graphite | <b>0.048</b> | 2.532        | 0.393         |
|              |                | GVAE     | 0.027        | 2.269        | 0.393         |
|              |                | GraphRNN | 0.027        | 3.848        | 0.006         |
|              |                | WGAN     | 0.000        | 5.051        | 0.005         |
|              |                | CO-VAE   | 0.000        | <b>1.895</b> | 0.002         |
|              |                | DECO-VAE | 0.020        | 2.313        | <b>0.000</b>  |
|              | N Edges        | Graphite | <b>0.048</b> | 2.532        | 842.692       |
|              |                | GVAE     | 0.027        | 2.268        | 843.290       |
|              |                | GraphRNN | 0.027        | 3.818        | 13.864        |
|              |                | WGAN     | 0.000        | 12.722       | 10.403        |
|              |                | CO-VAE   | 0.000        | <b>1.895</b> | 3.769         |
|              |                | DECO-VAE | 0.020        | 2.314        | <b>1.492</b>  |
|              | Avg-Deg-Cor    | Graphite | 0.015        | 2.977        | 0.125         |
|              |                | GVAE     | 0.009        | 2.946        | 0.125         |
|              |                | GraphRNN | 0.010        | 4.164        | 0.190         |
|              |                | WGAN     | 0.000        | 6.575        | 0.045         |
|              |                | CO-VAE   | <b>0.057</b> | <b>2.713</b> | 0.010         |
|              |                | DECO-VAE | 0.022        | 2.918        | <b>0.009</b>  |
|              | Transitivity   | Graphite | 0.061        | 2.988        | 0.089         |
|              |                | GVAE     | 0.019        | 2.981        | 0.089         |
|              |                | GraphRNN | <b>0.144</b> | 4.292        | 0.260         |
|              |                | WGAN     | 0.000        | 6.418        | 0.050         |
|              |                | CO-VAE   | 0.026        | <b>2.661</b> | <b>0.003</b>  |
|              |                | DECO-VAE | 0.008        | 2.789        | <b>0.003</b>  |
| D 7          | Density        | Graphite | 0.008        | 3.904        | 0.450         |
|              |                | GVAE     | <b>0.027</b> | 3.800        | 0.450         |
|              |                | GraphRNN | 0.017        | 4.326        | 0.012         |
|              |                | WGAN     | 0.000        | 5.892        | 0.043         |
|              |                | CO-VAE   | 0.020        | <b>2.895</b> | <b>0.009</b>  |
|              |                | DECO-VAE | 0.006        | 3.219        | 0.012         |
|              | N Edges        | Graphite | 0.008        | 3.904        | 4314.204      |
|              |                | GVAE     | <b>0.027</b> | 3.800        | 4320.031      |
|              |                | GraphRNN | 0.017        | 4.326        | 91.851        |
|              |                | WGAN     | 0.000        | 13.652       | 101.028       |
|              |                | CO-VAE   | 0.020        | <b>2.878</b> | <b>89.220</b> |
|              |                | DECO-VAE | 0.006        | 3.219        | 111.235       |
|              | Avg-Deg-Cor    | Graphite | 0.000        | 4.082        | 0.218         |
|              |                | GVAE     | 0.008        | 4.083        | 0.218         |
|              |                | GraphRNN | 0.000        | 4.240        | 0.247         |
|              |                | WGAN     | 0.000        | 7.445        | <b>0.039</b>  |
|              |                | CO-VAE   | 0.000        | <b>3.662</b> | 0.189         |
|              |                | DECO-VAE | <b>0.014</b> | 3.913        | 0.185         |
|              | Transitivity   | Graphite | 0.003        | 4.061        | 0.118         |
|              |                | GVAE     | 0.011        | 3.946        | 0.118         |
|              |                | GraphRNN | 0.000        | 4.351        | 0.252         |
|              |                | WGAN     | 0.000        | 7.338        | 0.041         |
|              |                | CO-VAE   | 0.010        | <b>3.615</b> | 0.036         |
|              |                | DECO-VAE | <b>0.015</b> | 3.810        | <b>0.034</b>  |
| D 8          | Density        | Graphite | 0.009        | 3.598        | 0.392         |
|              |                | GVAE     | 0.009        | 3.598        | 0.393         |
|              |                | GraphRNN | 0.011        | 4.227        | 0.007         |
|              |                | WGAN     | 0.000        | 6.081        | 0.005         |
|              |                | CO-VAE   | 0.024        | <b>2.409</b> | <b>0.001</b>  |
|              |                | DECO-VAE | <b>0.026</b> | 2.572        | <b>0.001</b>  |
|              | N Edges        | Graphite | 0.009        | 3.598        | 1032.517      |
|              |                | GVAE     | 0.009        | 3.588        | 1032.520      |
|              |                | GraphRNN | 0.011        | 4.227        | 17.749        |
|              |                | WGAN     | 0.000        | 13.871       | 11.234        |
|              |                | CO-VAE   | 0.024        | <b>2.409</b> | <b>1.356</b>  |
|              |                | DECO-VAE | <b>0.026</b> | 2.572        | 1.507         |
|              | Avg-Deg-Cor    | Graphite | 0.036        | 3.927        | 0.196         |
|              |                | GVAE     | 0.036        | 3.928        | 0.196         |
|              |                | GraphRNN | 0.003        | 4.293        | 0.282         |
|              |                | WGAN     | 0.000        | 7.645        | 0.022         |
|              |                | CO-VAE   | <b>0.044</b> | <b>3.591</b> | <b>0.010</b>  |
|              |                | DECO-VAE | 0.018        | 3.990        | <b>0.010</b>  |
|              | Transitivity   | Graphite | 0.004        | 4.010        | 0.055         |
|              |                | GVAE     | 0.004        | 4.009        | 0.055         |
|              |                | GraphRNN | 0.007        | 4.844        | 0.231         |
|              |                | WGAN     | 0.000        | 7.532        | 0.041         |
|              |                | CO-VAE   | <b>0.033</b> | <b>3.671</b> | <b>0.003</b>  |
|              |                | DECO-VAE | 0.006        | 3.945        | <b>0.003</b>  |

Table 4 lists the precision, coverage, recall, and F1 scores obtained by each model over the generated datasets, considering an experimentally-available structure as the ground truth. Fig. 4 highlights the F1 values obtained, excluding WGAN from this analysis (see manuscript).

Supplementary Table 5 compares the contact graphs generated by CO-VAE and DECO-VAE to the reference/training dataset and reports the differences in the average of NAT-C and NNONAT-C values obtained over the generated versus the training dataset.

We show the contact graphs and corresponding tertiary structures when varying latent factors for four more protein targets in Fig. 6 Fig. 7, respectively. The target proteins chosen are those with native PDB ids 1AOY, 1HHP, 1ISU(A), and 2H5N(D). The

**Table 2.** (Continued) Comparison of learned distributions (on each of the four graph properties of interest, listed in the rows) by their distance (according to PCC, BD, and EMD) to the training dataset for different proteins. The lowest BD and EMD values on each of the four graph properties of interest are highlighted in bold font.

|                 | Graph Property | Methods  | PCC          | BD           | EMD           |
|-----------------|----------------|----------|--------------|--------------|---------------|
|                 | D 9            | Density  | Graphite     | 0.008        | 5.410         |
| GVAE            |                |          | 0.007        | 5.415        | 0.466         |
| GraphRNN        |                |          | <b>0.022</b> | <b>2.450</b> | 0.004         |
| WGAN            |                |          | 0.000        | 5.594        | 0.061         |
| CO-VAE          |                |          | 0.018        | 4.941        | <b>0.002</b>  |
| DECO-VAE        |                |          | 0.004        | 3.740        | 0.004         |
| Number of Edges |                | Graphite | 0.007        | 5.410        | 1327.220      |
|                 |                | GVAE     | 0.007        | 5.415        | 1328.796      |
|                 |                | GraphRNN | <b>0.022</b> | <b>2.450</b> | 9.030         |
|                 |                | WGAN     | 0.000        | 13.495       | 164.424       |
|                 |                | CO-VAE   | 0.019        | 4.941        | <b>5.423</b>  |
|                 |                | DECO-VAE | 0.004        | 3.741        | 11.293        |
| Avg-Deg-Cor     |                | Graphite | <b>0.030</b> | 5.056        | 0.136         |
|                 |                | GVAE     | 0.009        | 5.401        | 0.030         |
|                 |                | GraphRNN | NA           | 3.413        | NA            |
|                 |                | WGAN     | 0.000        | 7.191        | 0.265         |
|                 |                | CO-VAE   | 0.005        | 5.310        | <b>0.017</b>  |
|                 |                | DECO-VAE | 0.004        | <b>3.361</b> | 0.092         |
| Transitivity    |                | Graphite | 0.008        | 5.436        | 0.244         |
|                 |                | GVAE     | 0.008        | 5.348        | 0.307         |
|                 |                | GraphRNN | <b>0.009</b> | <b>2.886</b> | 0.122         |
|                 |                | WGAN     | 0.000        | 7.133        | 0.205         |
|                 |                | CO-VAE   | 0.005        | 5.159        | <b>0.004</b>  |
|                 |                | DECO-VAE | 0.005        | 3.571        | 0.027         |
| D 10            | Density        | Graphite | <b>0.026</b> | <b>3.526</b> | 0.393         |
|                 |                | GVAE     | 0.024        | 4.572        | 0.411         |
|                 |                | GraphRNN | 0.023        | 4.976        | 0.025         |
|                 |                | WGAN     | 0.000        | 6.437        | 0.010         |
|                 |                | CO-VAE   | 0.010        | 3.845        | 0.009         |
|                 |                | DECO-VAE | 0.011        | 3.962        | <b>0.008</b>  |
|                 | N Edges        | Graphite | <b>0.026</b> | <b>3.526</b> | 1031.645      |
|                 |                | GVAE     | 0.024        | 4.572        | 1234.551      |
|                 |                | GraphRNN | 0.023        | 4.976        | 74.632        |
|                 |                | WGAN     | 0.000        | 14.444       | 30.164        |
|                 |                | CO-VAE   | 0.010        | 3.845        | 27.51         |
|                 |                | DECO-VAE | 0.011        | 3.962        | <b>23.31</b>  |
|                 | Avg-Deg-Cor    | Graphite | 0.009        | 4.869        | 0.197         |
|                 |                | GVAE     | 0.011        | 4.659        | 0.156         |
|                 |                | GraphRNN | 0.009        | 4.993        | 0.179         |
|                 |                | WGAN     | 0.000        | 8.093        | <b>0.041</b>  |
|                 |                | CO-VAE   | <b>0.012</b> | <b>4.286</b> | 0.089         |
|                 |                | DECO-VAE | 0.005        | 4.455        | 0.061         |
|                 | Transitivity   | Graphite | 0.004        | <b>4.047</b> | 0.055         |
|                 |                | GVAE     | <b>0.018</b> | 4.718        | 0.093         |
|                 |                | GraphRNN | 0.009        | 5.071        | 0.258         |
|                 |                | WGAN     | 0.000        | 7.971        | 0.063         |
|                 |                | CO-VAE   | 0.001        | 4.231        | <b>0.013</b>  |
|                 |                | DECO-VAE | 0.006        | 4.443        | 0.016         |
| D 11            | Density        | Graphite | 0.005        | 4.760        | 0.412         |
|                 |                | GVAE     | 0.017        | 3.983        | 0.412         |
|                 |                | GraphRNN | 0.005        | 4.746        | 0.009         |
|                 |                | WGAN     | 0.000        | 5.843        | <b>0.008</b>  |
|                 |                | CO-VAE   | <b>0.020</b> | 3.198        | 0.023         |
|                 |                | DECO-VAE | 0.006        | <b>3.005</b> | 0.026         |
|                 | N Edges        | Graphite | 0.005        | 4.762        | 1799.794      |
|                 |                | GVAE     | 0.017        | 3.983        | 1400.567      |
|                 |                | GraphRNN | 0.005        | 4.746        | <b>33.934</b> |
|                 |                | WGAN     | 0.000        | 13.976       | 26.482        |
|                 |                | CO-VAE   | <b>0.020</b> | 3.198        | 79.542        |
|                 |                | DECO-VAE | 0.006        | <b>3.005</b> | 88.277        |
|                 | Avg-Deg-Cor    | Graphite | 0.001        | 5.045        | 0.199         |
|                 |                | GVAE     | <b>0.035</b> | 3.939        | 0.110         |
|                 |                | GraphRNN | 0.020        | 4.617        | 0.213         |
|                 |                | WGAN     | 0.000        | 7.401        | <b>0.050</b>  |
|                 |                | CO-VAE   | 0.000        | 3.555        | 0.112         |
|                 |                | DECO-VAE | 0.004        | <b>3.543</b> | 0.106         |
|                 | Transitivity   | Graphite | 0.002        | 4.944        | 0.115         |
|                 |                | GVAE     | 0.023        | 3.999        | <b>0.079</b>  |
|                 |                | GraphRNN | 0.005        | 4.640        | 0.311         |
|                 |                | WGAN     | 0.000        | 7.288        | 0.080         |
|                 |                | CO-VAE   | 0.016        | 3.347        | 0.089         |
|                 |                | DECO-VAE | <b>0.025</b> | <b>3.283</b> | 0.129         |
| D 12            | Density        | Graphite | 0.004        | 4.753        | 0.411         |
|                 |                | GVAE     | 0.004        | 4.754        | 0.411         |
|                 |                | GraphRNN | <b>0.015</b> | 5.069        | 0.003         |
|                 |                | WGAN     | 0.000        | 7.703        | 0.655         |
|                 |                | CO-VAE   | 0.005        | <b>4.076</b> | <b>0.002</b>  |
|                 |                | DECO-VAE | 0.010        | 4.187        | 0.001         |
|                 | N Edges        | Graphite | 0.004        | 4.754        | 1796.572      |
|                 |                | GVAE     | 0.004        | 4.754        | 1796.570      |
|                 |                | GraphRNN | <b>0.015</b> | 5.069        | 13.888        |
|                 |                | WGAN     | 0.000        | 15.953       | 2507.665      |
|                 |                | CO-VAE   | 0.005        | <b>4.076</b> | <b>8.554</b>  |
|                 |                | DECO-VAE | 0.010        | 4.184        | 5.195         |
|                 | Avg-Deg-Cor    | Graphite | 0.000        | 5.045        | 0.198         |
|                 |                | GVAE     | 0.001        | 5.045        | 0.199         |
|                 |                | GraphRNN | <b>0.013</b> | 5.221        | 0.216         |
|                 |                | WGAN     | 0.000        | 8.558        | 0.197         |
|                 |                | CO-VAE   | 0.004        | <b>4.516</b> | 0.024         |
|                 |                | DECO-VAE | 0.001        | 4.884        | <b>0.016</b>  |
|                 | Transitivity   | Graphite | <b>0.019</b> | 4.899        | 0.115         |
|                 |                | GVAE     | 0.009        | 4.898        | 0.115         |
|                 |                | GraphRNN | 0.011        | 5.247        | 0.316         |
|                 |                | WGAN     | 0.000        | 8.498        | 0.260         |
|                 |                | CO-VAE   | 0.004        | <b>4.575</b> | <b>0.002</b>  |
|                 |                | DECO-VAE | 0.004        | 4.859        | <b>0.002</b>  |

latent factor we isolate to vary demonstrates its impact/control on the contact graphs (and corresponding tertiary structures). For example, on 1AOY, one can see that the factor controls the placement of the other secondary structures with respect to the major one in orange. On 1HHP, a core has been formed, and the factor largely controls the placement of the helix in green in relation to the core. On 1ISU(A), the factor largely controls the placement of the rest of the elements around the helix in green. One 2H5N(D), the factor largely controls the unfolding/folding of a core region and the packing of the helix in magenta around the core.

**Table 2.** (Continued) Comparison of learned distributions (on each of the four graph properties of interest, listed in the rows) by their distance (according to PCC, BD, and EMD) to the training dataset for different proteins. The lowest BD and EMD values on each of the four graph properties of interest are highlighted in bold font.

| D 13         | Graph Property | Methods  | PCC          | BD           | EMD           |
|--------------|----------------|----------|--------------|--------------|---------------|
|              | Density        |          | Graphite     | 0.012        | 2.744         |
| GVAE         |                |          | 0.033        | 2.857        | 0.419         |
| GraphRNN     |                |          | <b>0.069</b> | 3.893        | 0.012         |
| WGAN         |                |          | 0.000        | 4.788        | 0.008         |
| CO-VAE       |                |          | 0.022        | <b>1.939</b> | <b>0.003</b>  |
| DECO-VAE     |                |          | 0.000        | 2.569        | <b>0.003</b>  |
| N Edges      |                | Graphite | 0.012        | 2.744        | 2044.417      |
|              |                | GVAE     | 0.033        | 2.857        | 2033.940      |
|              |                | GraphRNN | <b>0.069</b> | 3.893        | 57.191        |
|              |                | WGAN     | 0.000        | 13.275       | 37.082        |
|              |                | CO-VAE   | 0.022        | <b>1.939</b> | <b>12.213</b> |
|              |                | DECO-VAE | 0.000        | 2.569        | 15.585        |
| Avg-Deg-Cor  |                | Graphite | <b>0.058</b> | 3.094        | 0.191         |
|              |                | GVAE     | 0.044        | 3.098        | 0.190         |
|              |                | GraphRNN | 0.001        | 4.095        | 0.260         |
|              |                | WGAN     | 0.000        | 6.584        | 0.056         |
|              |                | CO-VAE   | 0.006        | <b>2.731</b> | 0.032         |
|              |                | DECO-VAE | 0.027        | 2.872        | <b>0.024</b>  |
| Transitivity |                | Graphite | <b>0.031</b> | 3.120        | 0.119         |
|              |                | GVAE     | 0.014        | 3.126        | 0.119         |
|              |                | GraphRNN | 0.005        | 4.269        | 0.282         |
|              |                | WGAN     | 0.000        | 6.465        | 0.067         |
|              |                | CO-VAE   | 0.019        | <b>2.771</b> | 0.004         |
|              |                | DECO-VAE | 0.002        | 2.898        | <b>0.003</b>  |

  

| D 14         | Graph Property | Methods  | PCC          | BD           | EMD           |
|--------------|----------------|----------|--------------|--------------|---------------|
|              | Density        |          | Graphite     | 0.002        | 1.711         |
| GVAE         |                |          | 0.059        | 1.896        | 0.426         |
| GraphRNN     |                |          | 0.004        | 3.544        | <b>0.003</b>  |
| WGAN         |                |          | 0.000        | 3.501        | 0.005         |
| CO-VAE       |                |          | <b>0.071</b> | <b>0.926</b> | 0.006         |
| DECO-VAE     |                |          | 0.006        | 1.299        | 0.008         |
| N Edges      |                | Graphite | 0.002        | 1.711        | 3777.273      |
|              |                | GVAE     | 0.059        | 1.896        | 3735.452      |
|              |                | GraphRNN | 0.004        | 3.544        | <b>22.449</b> |
|              |                | WGAN     | 0.000        | 12.424       | 40.487        |
|              |                | CO-VAE   | <b>0.072</b> | <b>0.926</b> | 55.227        |
|              |                | DECO-VAE | 0.006        | 1.299        | 71.684        |
| Avg-Deg-Cor  |                | Graphite | 0.022        | 2.014        | 0.201         |
|              |                | GVAE     | <b>0.057</b> | 1.988        | 0.200         |
|              |                | GraphRNN | 0.033        | 3.749        | 0.275         |
|              |                | WGAN     | 0.000        | 5.472        | <b>0.016</b>  |
|              |                | CO-VAE   | 0.004        | <b>1.439</b> | 0.060         |
|              |                | DECO-VAE | 0.019        | 1.811        | 0.060         |
| Transitivity |                | Graphite | 0.032        | 1.993        | 0.107         |
|              |                | GVAE     | 0.072        | 2.000        | 0.107         |
|              |                | GraphRNN | <b>0.085</b> | 3.720        | 0.313         |
|              |                | WGAN     | 0.000        | 5.348        | 0.036         |
|              |                | CO-VAE   | 0.038        | <b>1.316</b> | <b>0.022</b>  |
|              |                | DECO-VAE | 0.002        | 1.540        | 0.024         |

  

| D 15         | Graph Property | Methods  | PCC          | BD           | EMD           |
|--------------|----------------|----------|--------------|--------------|---------------|
|              | Density        |          | Graphite     | <b>0.034</b> | 3.249         |
| GVAE         |                |          | 0.006        | 3.272        | 0.444         |
| GraphRNN     |                |          | 0.001        | 4.395        | <b>0.002</b>  |
| WGAN         |                |          | 0.000        | 4.628        | 0.004         |
| CO-VAE       |                |          | 0.001        | 3.022        | 0.022         |
| DECO-VAE     |                |          | 0.009        | <b>2.293</b> | 0.021         |
| N Edges      |                | Graphite | <b>0.034</b> | 3.249        | 4705.846      |
|              |                | GVAE     | 0.006        | 3.274        | 4694.770      |
|              |                | GraphRNN | 0.001        | 4.395        | <b>16.850</b> |
|              |                | WGAN     | 0.000        | 13.895       | 40.345        |
|              |                | CO-VAE   | 0.001        | 3.022        | 229.12        |
|              |                | DECO-VAE | 0.009        | <b>2.293</b> | 217.25        |
| Avg-Deg-Cor  |                | Graphite | 0.012        | 3.292        | 0.217         |
|              |                | GVAE     | 0.046        | 3.249        | 0.219         |
|              |                | GraphRNN | <b>0.053</b> | 4.263        | 0.302         |
|              |                | GAN      | 0.000        | 6.596        | <b>0.138</b>  |
|              |                | CO-VAE   | 0.024        | 3.165        | 0.180         |
|              |                | DECO-VAE | 0.015        | <b>3.067</b> | 0.183         |
| Transitivity |                | Graphite | 0.024        | 3.243        | 0.122         |
|              |                | GVAE     | 0.025        | 3.189        | 0.122         |
|              |                | GraphRNN | 0.034        | 4.368        | 0.329         |
|              |                | WGAN     | 0.000        | 6.440        | 0.154         |
|              |                | CO-VAE   | 0.017        | <b>2.819</b> | <b>0.113</b>  |
|              |                | DECO-VAE | <b>0.043</b> | 2.944        | 0.118         |

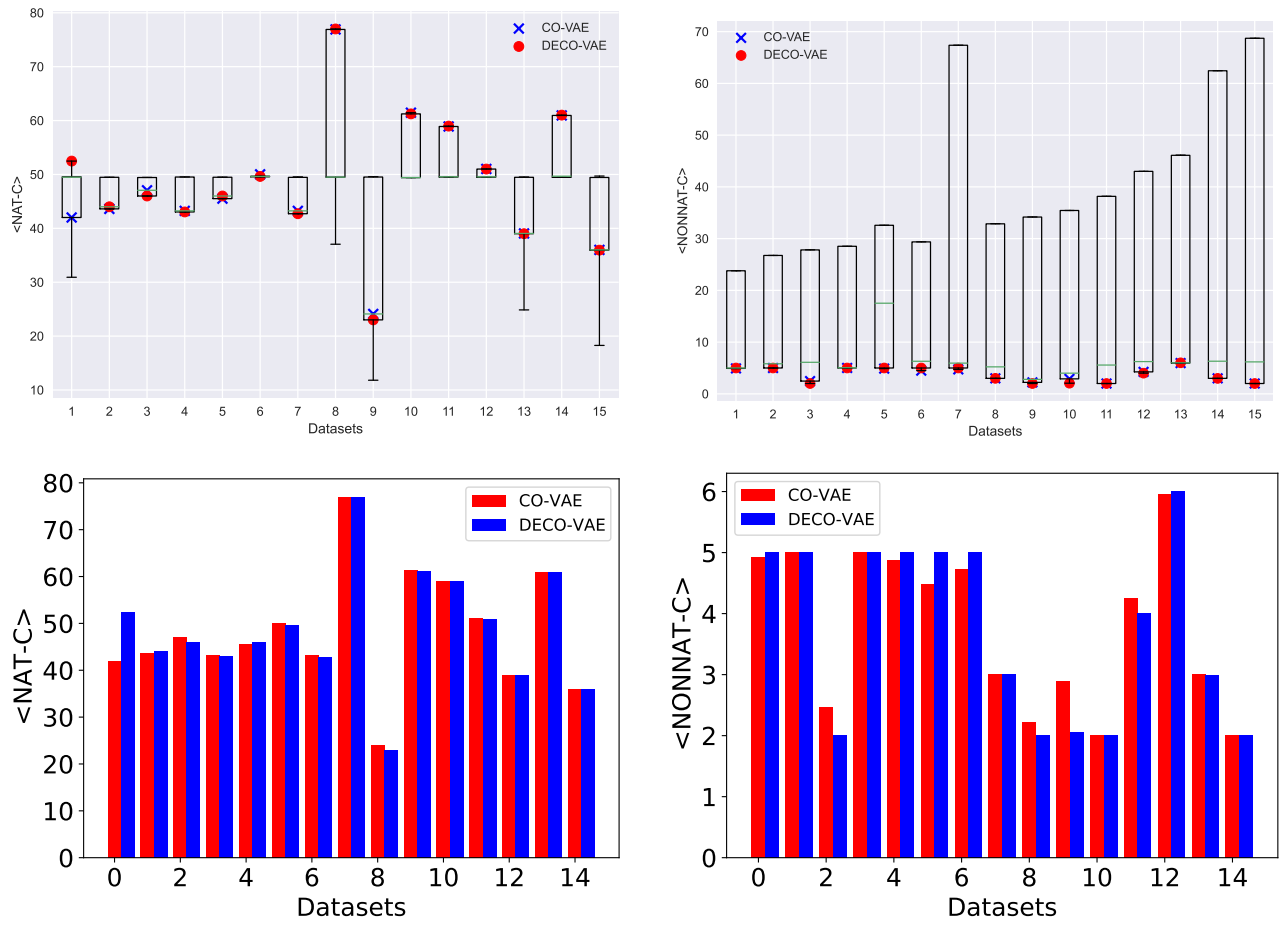

**Fig. 2.** The generated graphs are compared to a reference graph computed over an experimentally-available structure for each protein, and  $\langle \text{NAT-C} \rangle$  and  $\langle \text{NONNAT-C} \rangle$  values are computed over generated graphs. The boxplots show the range over all five models across all datasets. Annotations denote the values obtained by CO-VAE and DECO-VAE.

**Table 3.** Evaluation of the average of the NAT-C and NONNAT-C metrics over generated contact graphs. The best value in each metric (on each protein target) is highlighted in bold font. G-RNN abbreviates GraphRNN. Column 2 shows the PDB id (five-letter code to locate entries in the PDB at rcsb.org) of an experimentally-available structure employed as reference.

| Dataset | PDB ID  | Metric     | VGAE         | Graphite     | G-RNN       | WGAN  | CO-VAE       | DECO-VAE     |
|---------|---------|------------|--------------|--------------|-------------|-------|--------------|--------------|
| 1.      | 1BQ9    | <NAT-C>    | 49.49        | <b>49.56</b> | 30.92       | 1.96  | 42.01        | 42.48        |
|         |         | <NONNAT-C> | 23.79        | 23.79        | <b>4.88</b> | 7.98  | 4.92         | 5.00         |
| 2.      | 1DTD(B) | <NAT-C>    | 49.47        | <b>49.48</b> | 26.82       | 1.96  | 43.61        | 44.00        |
|         |         | <NONNAT-C> | 26.75        | 26.75        | 5.82        | 8.88  | <b>5.00</b>  | <b>5.00</b>  |
| 3.      | 1ISU(A) | <NAT-C>    | 49.43        | <b>49.45</b> | 28.65       | 12.11 | 47.06        | 46.00        |
|         |         | <NONNAT-C> | 27.82        | 27.84        | 6.10        | 56.04 | 2.47         | <b>2.00</b>  |
| 4.      | 1C8C(A) | <NAT-C>    | 49.52        | <b>49.54</b> | 29.45       | 2.09  | 43.24        | 43.04        |
|         |         | <NONNAT-C> | 28.53        | 28.52        | 5.06        | 8.58  | 5.01         | <b>5.00</b>  |
| 5.      | 1HZ6(A) | <NAT-C>    | 49.48        | <b>49.50</b> | 35.48       | 1.67  | 45.51        | 46.00        |
|         |         | <NONNAT-C> | 32.59        | 32.58        | 17.52       | 7.75  | <b>4.88</b>  | 5.00         |
| 6.      | 1SAP    | <NAT-C>    | 49.56        | 49.67        | 30.35       | 2.04  | <b>50.02</b> | 49.63        |
|         |         | <NONNAT-C> | 29.37        | 29.38        | 6.30        | 8.63  | <b>4.49</b>  | 5.00         |
| 7.      | 1FWP    | <NAT-C>    | 49.46        | <b>49.55</b> | 24.26       | 1.27  | 43.24        | 42.71        |
|         |         | <NONNAT-C> | 67.38        | 67.37        | 5.94        | 6.07  | <b>4.73</b>  | 5.00         |
| 8.      | 1AIL    | <NAT-C>    | 49.51        | 49.50        | 37.05       | 2.05  | 76.91        | <b>77.00</b> |
|         |         | <NONNAT-C> | 32.89        | 32.86        | 5.22        | 8.94  | <b>3.00</b>  | <b>3.00</b>  |
| 9.      | 1DTJ(A) | <NAT-C>    | <b>49.58</b> | 49.52        | 11.81       | 0.98  | 24.11        | 23.01        |
|         |         | <NONNAT-C> | 34.17        | 34.19        | 2.80        | 4.49  | 2.22         | <b>2.00</b>  |
| 10.     | 1AOY    | <NAT-C>    | 49.43        | 49.41        | 28.08       | 2.07  | <b>61.46</b> | 61.24        |
|         |         | <NONNAT-C> | 35.44        | 35.44        | 4.00        | 8.35  | 2.90         | <b>2.06</b>  |
| 11.     | 1CC5    | <NAT-C>    | 49.57        | 49.51        | 30.32       | 1.71  | 58.90        | <b>58.97</b> |
|         |         | <NONNAT-C> | 38.19        | 38.17        | 5.57        | 8.72  | <b>2.00</b>  | <b>2.00</b>  |
| 12.     | 1TIG    | NAT-C/L    | 49.49        | 49.56        | 25.57       | 10.21 | <b>51.02</b> | 51.00        |
|         |         | <NONNAT-C> | 43.00        | 43.00        | 6.24        | 46.31 | 4.25         | <b>4.00</b>  |
| 13.     | 1HHP    | NAT-C/L    | 49.47        | <b>49.53</b> | 24.86       | 2.12  | 39.05        | 39.00        |
|         |         | <NONNAT-C> | 46.10        | 46.14        | <b>5.91</b> | 9.22  | 5.95         | 6.00         |
| 14.     | 2H5ND   | NAT-C/L    | 49.46        | 49.67        | 26.33       | 2.00  | 60.95        | <b>61.01</b> |
|         |         | <NONNAT-C> | 62.44        | 62.45        | 6.31        | 9.00  | 3.00         | <b>2.99</b>  |
| 15.     | 1ALY    | <NAT-C>    | 49.44        | <b>49.70</b> | 18.27       | 1.63  | 36.00        | 35.95        |
|         |         | <NONNAT-C> | 68.72        | 68.72        | 6.18        | 7.99  | <b>2.00</b>  | <b>2.00</b>  |



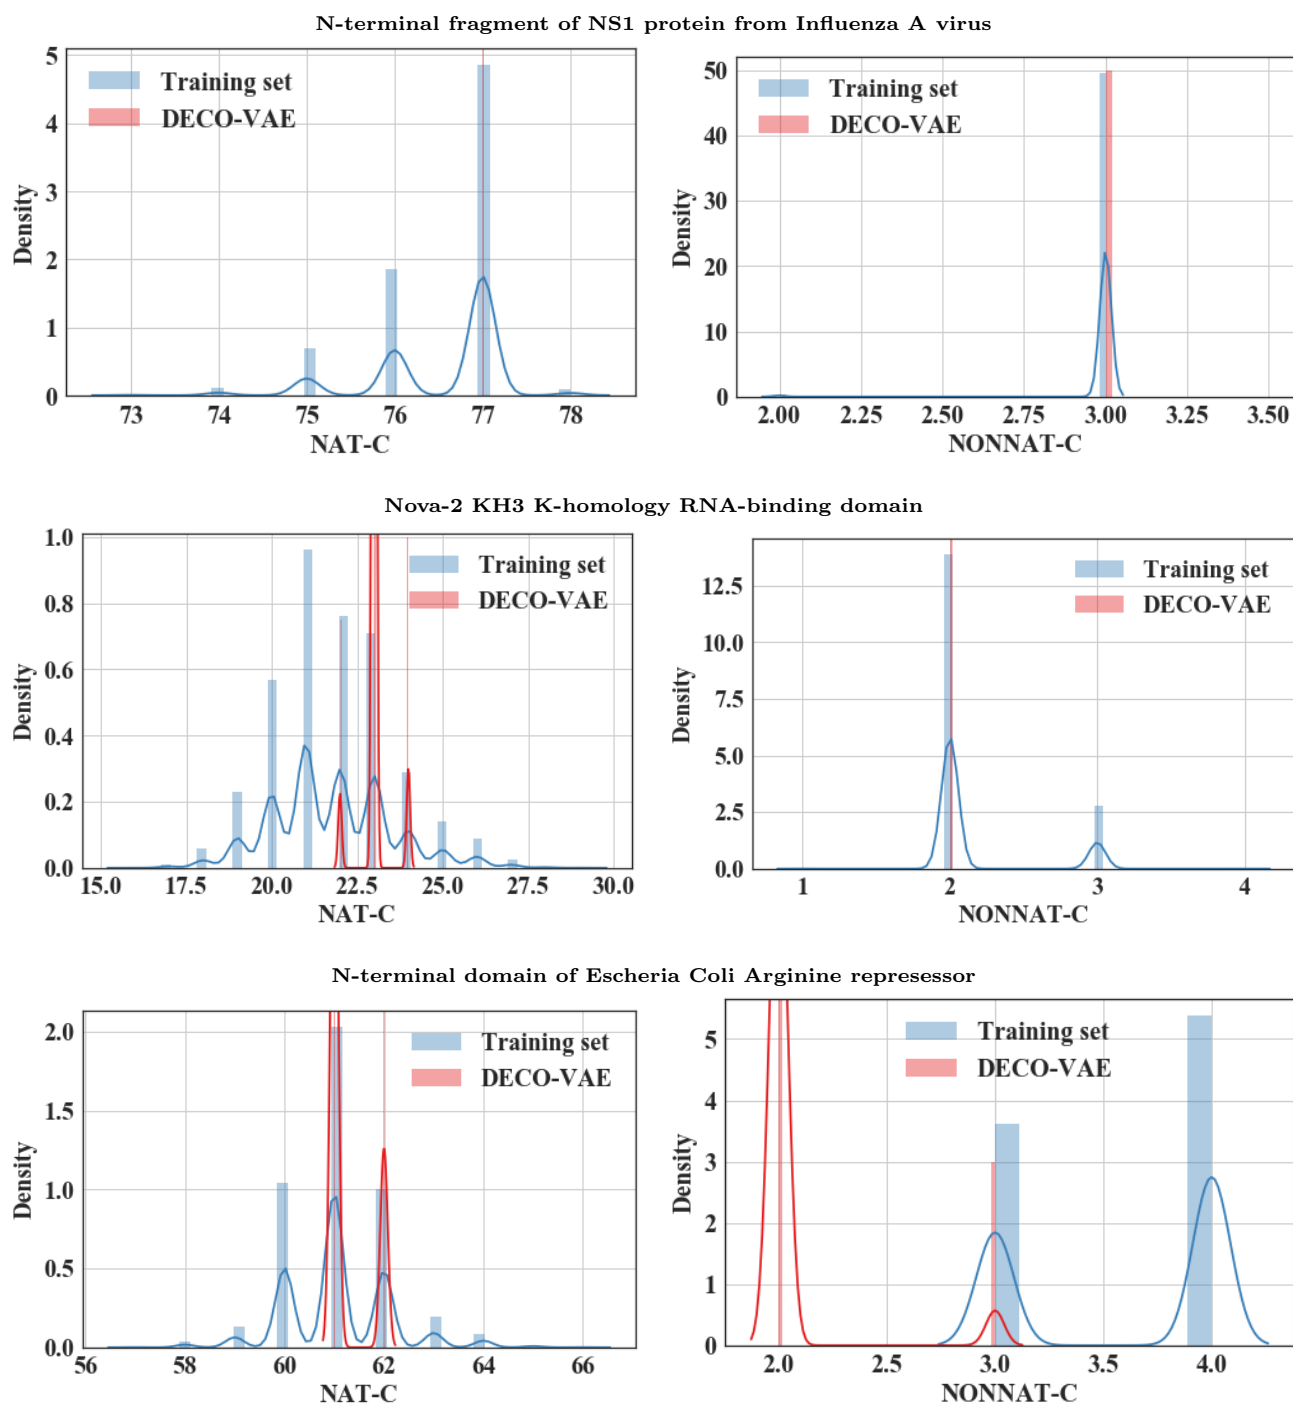

**Fig. 3.** Distributions of percentage of native contacts and number of non-native contacts per amino acid are shown for the DECO-VAE- and Rosetta-generated datasets for three selected protein targets. Each column contains both NAT-C and NONNAT-C distributions.

**Table 4.** Evaluation of generated contact graphs on each protein target across the five models in terms of precision, recall, coverage, and F1 score. The best value in each metric (on each protein target) is highlighted in bold font. Column 1 also shows the PDB id (five-letter code to locate entries in the PDB at rcsb.org of an experimentally-available structure employed as the ground truth.

| PDB ID      | Model    | Prec          | Covg          | Rec           | F1            |
|-------------|----------|---------------|---------------|---------------|---------------|
| 1. 1BQ9     | Graphite | 0.1566        | 0.4809        | 0.4994        | 0.2384        |
|             | GVAE     | 0.1568        | <b>0.4815</b> | 0.5001        | 0.2387        |
|             | GraphRNN | 0.3659        | 0.3232        | 0.3356        | 0.3494        |
|             | WGAN     | 0.2971        | 0.0447        | <b>0.5817</b> | 0.3932        |
|             | CO-VAE   | <b>0.4658</b> | 0.4451        | 0.4622        | <b>0.4639</b> |
| 2. 1DTD(B)  | DECO-VAE | 0.4638        | 0.4363        | 0.4531        | 0.4584        |
|             | Graphite | 0.1526        | 0.4893        | 0.5002        | 0.2338        |
|             | GVAE     | 0.1526        | 0.4892        | 0.5001        | 0.2339        |
|             | GraphRNN | 0.2974        | 0.2696        | 0.2755        | 0.2858        |
|             | WGAN     | 0.4336        | 0.0631        | <b>0.8510</b> | 0.5745        |
| 3. 1ISU(A)  | CO-VAE   | <b>0.6144</b> | 0.5961        | 0.6093        | 0.6118        |
|             | DECO-VAE | 0.6136        | <b>0.6041</b> | 0.6148        | <b>0.6142</b> |
|             | Graphite | 0.1534        | 0.4891        | 0.4996        | 0.2348        |
|             | GVAE     | 0.1537        | <b>0.4898</b> | 0.5003        | 0.2351        |
|             | GraphRNN | 0.2837        | 0.2546        | 0.2601        | 0.2711        |
| 4. 1C8C(A)  | WGAN     | 0.0785        | 0.0709        | <b>0.9501</b> | 0.1450        |
|             | CO-VAE   | 0.7542        | 0.4738        | 0.4839        | 0.5886        |
|             | DECO-VAE | <b>0.8435</b> | 0.4738        | 0.4839        | <b>0.6151</b> |
|             | Graphite | 0.1322        | 0.4907        | 0.5002        | 0.2091        |
|             | GVAE     | 0.1319        | 0.4900        | 0.4995        | 0.2088        |
| 5. 1HZ6(A)  | GraphRNN | 0.3381        | 0.3065        | 0.3124        | 0.3239        |
|             | WGAN     | 0.4300        | 0.0576        | <b>0.8975</b> | 0.5813        |
|             | CO-VAE   | 0.6513        | <b>0.6707</b> | 0.6837        | 0.6670        |
|             | DECO-VAE | <b>0.6538</b> | 0.6695        | 0.6824        | <b>0.6678</b> |
|             | Graphite | 0.1500        | <b>0.4933</b> | <b>0.5000</b> | 0.2308        |
| 6. 1SAP     | GVAE     | 0.1500        | <b>0.4933</b> | <b>0.5000</b> | 0.2307        |
|             | GraphRNN | 0.1849        | 0.3543        | 0.3592        | 0.2441        |
|             | WGAN     | 0.2781        | 0.0336        | 0.4641        | 0.3477        |
|             | CO-VAE   | 0.5960        | 0.4519        | 0.4581        | 0.5179        |
|             | DECO-VAE | <b>0.6067</b> | 0.4545        | 0.4607        | <b>0.5237</b> |
| 7. 1FWP     | Graphite | 0.1329        | 0.4958        | 0.4993        | 0.2099        |
|             | GVAE     | 0.1332        | 0.4964        | 0.5000        | 0.2103        |
|             | GraphRNN | 0.3021        | 0.3178        | 0.3202        | 0.3107        |
|             | WGAN     | 0.4341        | 0.0568        | <b>0.8860</b> | 0.5826        |
|             | CO-VAE   | 0.3021        | 0.3179        | 0.3201        | 0.3106        |
| 8. 1AIL     | DECO-VAE | <b>0.6681</b> | <b>0.6838</b> | 0.6888        | <b>0.6783</b> |
|             | Graphite | 0.1405        | 0.4849        | 0.5001        | 0.2193        |
|             | GVAE     | 0.1401        | 0.4838        | 0.4989        | 0.2188        |
|             | GraphRNN | 0.3478        | 0.2558        | 0.2638        | 0.2992        |
|             | WGAN     | 0.3644        | 0.0320        | 0.4610        | 0.4067        |
| 9. 1DTJ(A)  | CO-VAE   | <b>0.8426</b> | <b>0.4705</b> | <b>0.4852</b> | <b>0.6158</b> |
|             | DECO-VAE | 0.8322        | 0.4695        | 0.4842        | 0.6122        |
|             | Graphite | 0.1277        | 0.4912        | 0.4994        | 0.2034        |
|             | GVAE     | 0.1276        | 0.4911        | 0.4992        | 0.2032        |
|             | GraphRNN | 0.3900        | 0.3718        | 0.3780        | 0.3836        |
| 10. 1A0Y    | WGAN     | 0.4545        | 0.0580        | <b>0.9322</b> | 0.6110        |
|             | CO-VAE   | <b>0.8244</b> | 0.8391        | 0.8531        | <b>0.8385</b> |
|             | DECO-VAE | 0.8231        | <b>0.8393</b> | 0.8533        | 0.8379        |
|             | Graphite | 0.1065        | 0.4963        | 0.4995        | 0.1756        |
|             | GVAE     | 0.1066        | 0.4964        | 0.4996        | 0.1757        |
| 11. 1CC5    | GraphRNN | 0.3717        | 0.2959        | 0.2978        | 0.3299        |
|             | WGAN     | 0.3908        | 0.0418        | <b>0.8100</b> | 0.5271        |
|             | CO-VAE   | 0.7620        | <b>0.7363</b> | 0.7409        | 0.7511        |
|             | DECO-VAE | <b>0.8109</b> | 0.7299        | 0.7345        | <b>0.7708</b> |
|             | Graphite | 0.1234        | 0.4843        | 0.4997        | 0.1980        |
| 12. 1TIG    | GVAE     | 0.1234        | 0.4846        | 0.4999        | 0.1979        |
|             | GraphRNN | 0.3489        | 0.2733        | 0.2820        | 0.3117        |
|             | WGAN     | 0.3771        | 0.0396        | <b>0.6448</b> | 0.4757        |
|             | CO-VAE   | <b>0.8972</b> | <b>0.5878</b> | 0.6064        | <b>0.7237</b> |
|             | DECO-VAE | 0.8965        | 0.5864        | 0.6051        | 0.7225        |
| 13. 1HHP    | Graphite | 0.1055        | 0.4945        | 0.5008        | 0.1742        |
|             | GVAE     | 0.1054        | 0.4939        | 0.5001        | 0.1740        |
|             | GraphRNN | 0.2787        | 0.2687        | 0.2721        | 0.2752        |
|             | WGAN     | 0.0544        | 0.0286        | 0.5555        | 0.0991        |
|             | CO-VAE   | 0.5797        | <b>0.5691</b> | <b>0.5764</b> | <b>0.5780</b> |
| 14. 2H5N(D) | DECO-VAE | <b>0.5799</b> | 0.5689        | 0.5761        | <b>0.5780</b> |
|             | Graphite | 0.0902        | 0.4979        | 0.5003        | 0.1529        |
|             | GVAE     | 0.0903        | 0.4978        | 0.5002        | 0.1529        |
|             | GraphRNN | 0.2804        | 0.2582        | 0.2594        | 0.2693        |
|             | WGAN     | 0.4040        | 0.0376        | <b>0.8554</b> | 0.5488        |
| 15. 1ALY    | CO-VAE   | 0.6494        | <b>0.6612</b> | 0.6643        | 0.6567        |
|             | DECO-VAE | <b>0.6544</b> | 0.6591        | 0.6622        | <b>0.6583</b> |
|             | Graphite | 0.0748        | 0.4976        | 0.5004        | 0.1302        |
|             | GVAE     | 0.0747        | 0.4971        | 0.4998        | 0.1300        |
|             | GraphRNN | 0.2846        | 0.2829        | 0.2845        | 0.2844        |
| 15. 1ALY    | WGAN     | 0.3195        | 0.0233        | 0.6364        | 0.4250        |
|             | CO-VAE   | 0.7127        | <b>0.6393</b> | <b>0.6428</b> | 0.6759        |
|             | DECO-VAE | <b>0.7248</b> | 0.6354        | 0.6389        | <b>0.6791</b> |
|             | Graphite | 0.0684        | 0.4981        | 0.5002        | 0.1203        |
|             | GVAE     | 0.0683        | <b>0.4989</b> | <b>0.5011</b> | 0.1206        |
| 15. 1ALY    | GraphRNN | 0.2356        | 0.1979        | 0.1987        | 0.2155        |
|             | WGAN     | 0.2607        | 0.0142        | 0.4235        | 0.3226        |
|             | CO-VAE   | 0.8034        | 0.4463        | 0.4482        | 0.5754        |
|             | DECO-VAE | <b>0.8468</b> | 0.4408        | 0.4427        | <b>0.5791</b> |

| PDB ID      | Model    | Prec          | Covg          | Rec           | F1            |
|-------------|----------|---------------|---------------|---------------|---------------|
| 9. 1DTJ(A)  | Graphite | 0.1320        | 0.5000        | <b>0.5000</b> | 0.2031        |
|             | GVAE     | 0.1390        | <b>0.5109</b> | <b>0.5000</b> | 0.2101        |
|             | GraphRNN | 0.3153        | 0.1301        | 0.1301        | 0.1733        |
|             | WGAN     | 0.4449        | 0.0270        | 0.4373        | 0.4402        |
|             | CO-VAE   | <b>0.7432</b> | 0.3310        | 0.3312        | 0.4607        |
| 10. 1A0Y    | DECO-VAE | 0.7429        | 0.3347        | 0.3346        | <b>0.4618</b> |
|             | Graphite | 0.1065        | 0.4963        | 0.4995        | 0.1756        |
|             | GVAE     | 0.1066        | 0.4964        | 0.4996        | 0.1757        |
|             | GraphRNN | 0.3717        | 0.2959        | 0.2978        | 0.3299        |
|             | WGAN     | 0.3908        | 0.0418        | <b>0.8100</b> | 0.5271        |
| 11. 1CC5    | CO-VAE   | 0.7620        | <b>0.7363</b> | 0.7409        | 0.7511        |
|             | DECO-VAE | <b>0.8109</b> | 0.7299        | 0.7345        | <b>0.7708</b> |
|             | Graphite | 0.1234        | 0.4843        | 0.4997        | 0.1980        |
|             | GVAE     | 0.1234        | 0.4846        | 0.4999        | 0.1979        |
|             | GraphRNN | 0.3489        | 0.2733        | 0.2820        | 0.3117        |
| 12. 1TIG    | WGAN     | 0.3771        | 0.0396        | <b>0.6448</b> | 0.4757        |
|             | CO-VAE   | <b>0.8972</b> | <b>0.5878</b> | 0.6064        | <b>0.7237</b> |
|             | DECO-VAE | 0.8965        | 0.5864        | 0.6051        | 0.7225        |
|             | Graphite | 0.1055        | 0.4945        | 0.5008        | 0.1742        |
|             | GVAE     | 0.1054        | 0.4939        | 0.5001        | 0.1740        |
| 13. 1HHP    | GraphRNN | 0.2787        | 0.2687        | 0.2721        | 0.2752        |
|             | WGAN     | 0.0544        | 0.0286        | 0.5555        | 0.0991        |
|             | CO-VAE   | 0.5797        | <b>0.5691</b> | <b>0.5764</b> | <b>0.5780</b> |
|             | DECO-VAE | <b>0.5799</b> | 0.5689        | 0.5761        | <b>0.5780</b> |
|             | Graphite | 0.0902        | 0.4979        | 0.5003        | 0.1529        |
| 14. 2H5N(D) | GVAE     | 0.0903        | 0.4978        | 0.5002        | 0.1529        |
|             | GraphRNN | 0.2804        | 0.2582        | 0.2594        | 0.2693        |
|             | WGAN     | 0.4040        | 0.0376        | <b>0.8554</b> | 0.5488        |
|             | CO-VAE   | 0.6494        | <b>0.6612</b> | 0.6643        | 0.6567        |
|             | DECO-VAE | <b>0.6544</b> | 0.6591        | 0.6622        | <b>0.6583</b> |
| 15. 1ALY    | Graphite | 0.0748        | 0.4976        | 0.5004        | 0.1302        |
|             | GVAE     | 0.0747        | 0.4971        | 0.4998        | 0.1300        |
|             | GraphRNN | 0.2846        | 0.2829        | 0.2845        | 0.2844        |
|             | WGAN     | 0.3195        | 0.0233        | 0.6364        | 0.4250        |
|             | CO-VAE   | 0.7127        | <b>0.6393</b> | <b>0.6428</b> | 0.6759        |
| 15. 1ALY    | DECO-VAE | <b>0.7248</b> | 0.6354        | 0.6389        | <b>0.6791</b> |
|             | Graphite | 0.0684        | 0.4981        | 0.5002        | 0.1203        |
|             | GVAE     | 0.0683        | <b>0.4989</b> | <b>0.5011</b> | 0.1206        |
|             | GraphRNN | 0.2356        | 0.1979        | 0.1987        | 0.2155        |
|             | WGAN     | 0.2607        | 0.0142        | 0.4235        | 0.3226        |
| 15. 1ALY    | CO-VAE   | 0.8034        | 0.4463        | 0.4482        | 0.5754        |
|             | DECO-VAE | <b>0.8468</b> | 0.4408        | 0.4427        | <b>0.5791</b> |

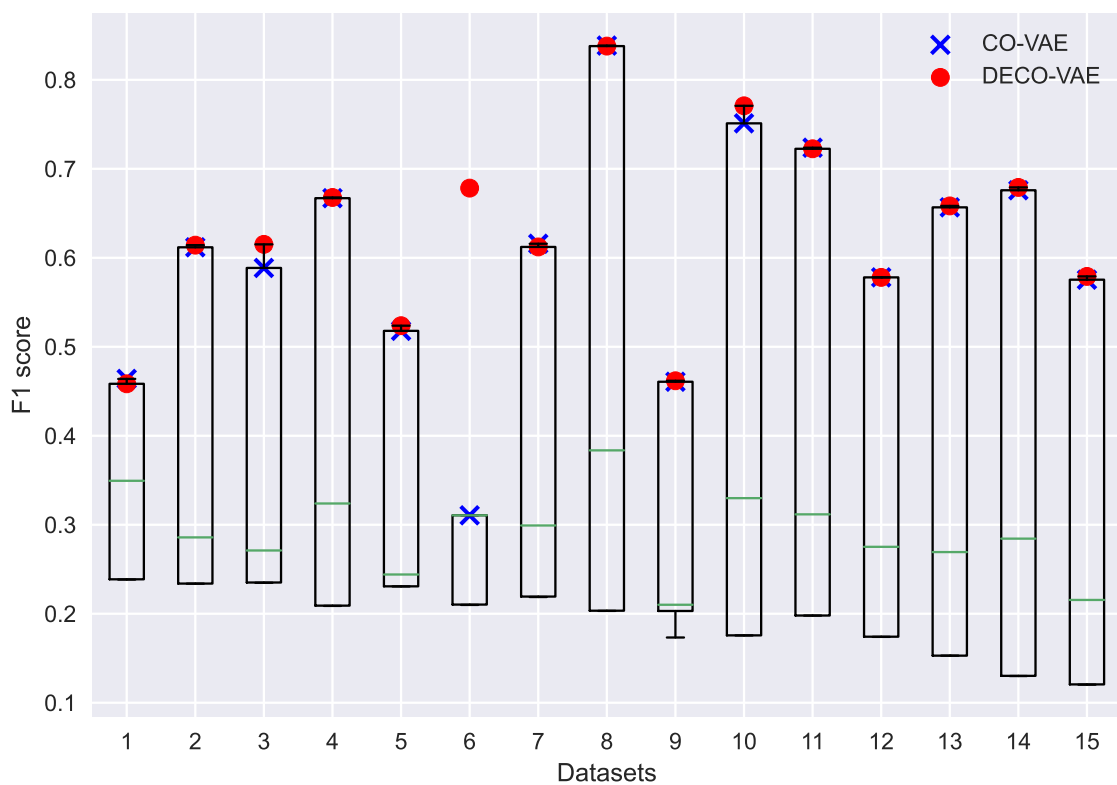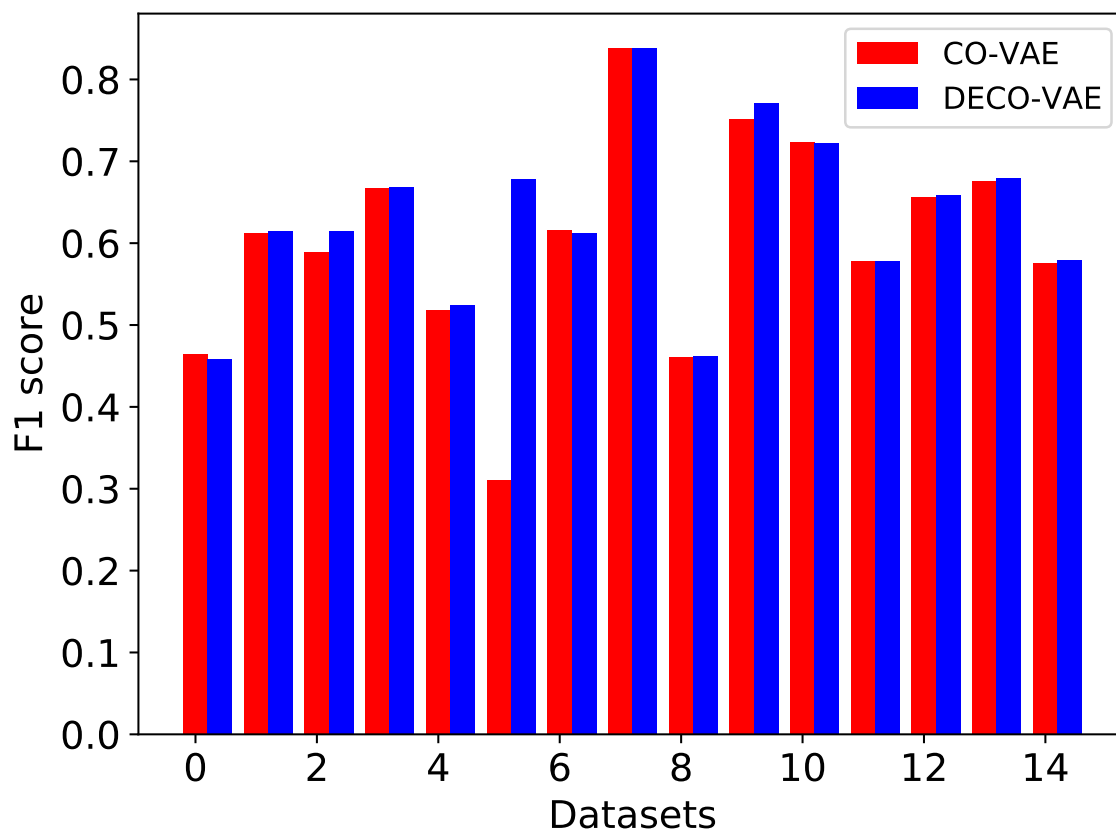

**Fig. 4.** The generated graphs are compared to a reference graph computed over an experimentally-available structure for each protein. The top panel shows via boxplots the range of F1 scores over all five models, excluding WGAN, across all datasets. Annotations denote the values obtained by CO-VAE and DECO-VAE. The bottom panel focuses the comparison to CO-VAE and DECO-VAE.

**Table 5.** Comparison of the average of the  $\langle \text{NAT-C} \rangle$  and  $\langle \text{NONNAT-C} \rangle$  metrics over contact graphs generated by CO-VAE and DECO-VAE to those over the training datasets. Column 2 reports on the difference ( $\Delta$ ) of each metric in the CO-VAE- or DECO-VAE-generated datasets from the corresponding metric in the training datasets. Smallest values per metric on each protein target are highlighted in bold font. Column 2 shows the PDB id (five-letter code to locate entries in the PDB at rcsb.org of an experimentally-available structure employed as reference.

| Dataset    | PDB ID  | Metric           | CO-VAE      | DECO-VAE    |
|------------|---------|------------------|-------------|-------------|
| Dataset 1  | 1BQ9    | $\Delta$ -NAT    | <b>0.48</b> | 0.95        |
|            |         | $\Delta$ -NONNAT | <b>0.01</b> | 0.08        |
| Dataset 2  | 1DTD(B) | $\Delta$ -NAT    | <b>0.19</b> | 0.57        |
|            |         | $\Delta$ -NONNAT | <b>0.01</b> | <b>0.01</b> |
| Dataset 3  | 1ISU(A) | $\Delta$ -NAT    | <b>0.33</b> | 0.73        |
|            |         | $\Delta$ -NONNAT | <b>2.43</b> | 2.80        |
| Dataset 4  | 1C8C(A) | $\Delta$ -NAT    | 0.23        | <b>0.03</b> |
|            |         | $\Delta$ -NONNAT | <b>0.01</b> | 0.02        |
| Dataset 5  | 1HZ6(A) | $\Delta$ -NAT    | 0.24        | <b>0.01</b> |
|            |         | $\Delta$ -NONNAT | 0.28        | <b>0.16</b> |
| Dataset 6  | 1SAP    | $\Delta$ -NAT    | 0.36        | <b>0.03</b> |
|            |         | $\Delta$ -NONNAT | <b>0.03</b> | 0.48        |
| Dataset 7  | 1FWP    | $\Delta$ -NAT    | 0.55        | <b>0.02</b> |
|            |         | $\Delta$ -NONNAT | 1.40        | <b>1.13</b> |
| Dataset 8  | 1AIL    | $\Delta$ -NAT    | <b>0.01</b> | <b>0.01</b> |
|            |         | $\Delta$ -NONNAT | <b>0.01</b> | <b>0.01</b> |
| Dataset 9  | 1DTJ(A) | $\Delta$ -NAT    | 2.34        | <b>1.24</b> |
|            |         | $\Delta$ -NONNAT | <b>0.05</b> | 0.17        |
| Dataset 10 | 1AOY    | $\Delta$ -NAT    | 0.39        | <b>0.17</b> |
|            |         | $\Delta$ -NONNAT | <b>0.69</b> | 1.54        |
| Dataset 11 | 1CC5    | $\Delta$ -NAT    | <b>1.97</b> | 2.04        |
|            |         | $\Delta$ -NONNAT | <b>2.61</b> | <b>2.61</b> |
| Dataset 12 | 1TIG    | $\Delta$ -NAT    | <b>0.14</b> | 0.16        |
|            |         | $\Delta$ -NONNAT | <b>0.31</b> | 0.56        |
| Dataset 13 | 1HHP    | $\Delta$ -NAT    | 0.22        | <b>0.17</b> |
|            |         | $\Delta$ -NONNAT | 0.06        | <b>0.01</b> |
| Dataset 14 | 2H5ND   | $\Delta$ -NAT    | 0.07        | <b>0.01</b> |
|            |         | $\Delta$ -NONNAT | <b>0.93</b> | 0.94        |
| Dataset 15 | 1ALY    | $\Delta$ -NAT    | 0.47        | <b>0.42</b> |
|            |         | $\Delta$ -NONNAT | <b>2.99</b> | <b>2.99</b> |

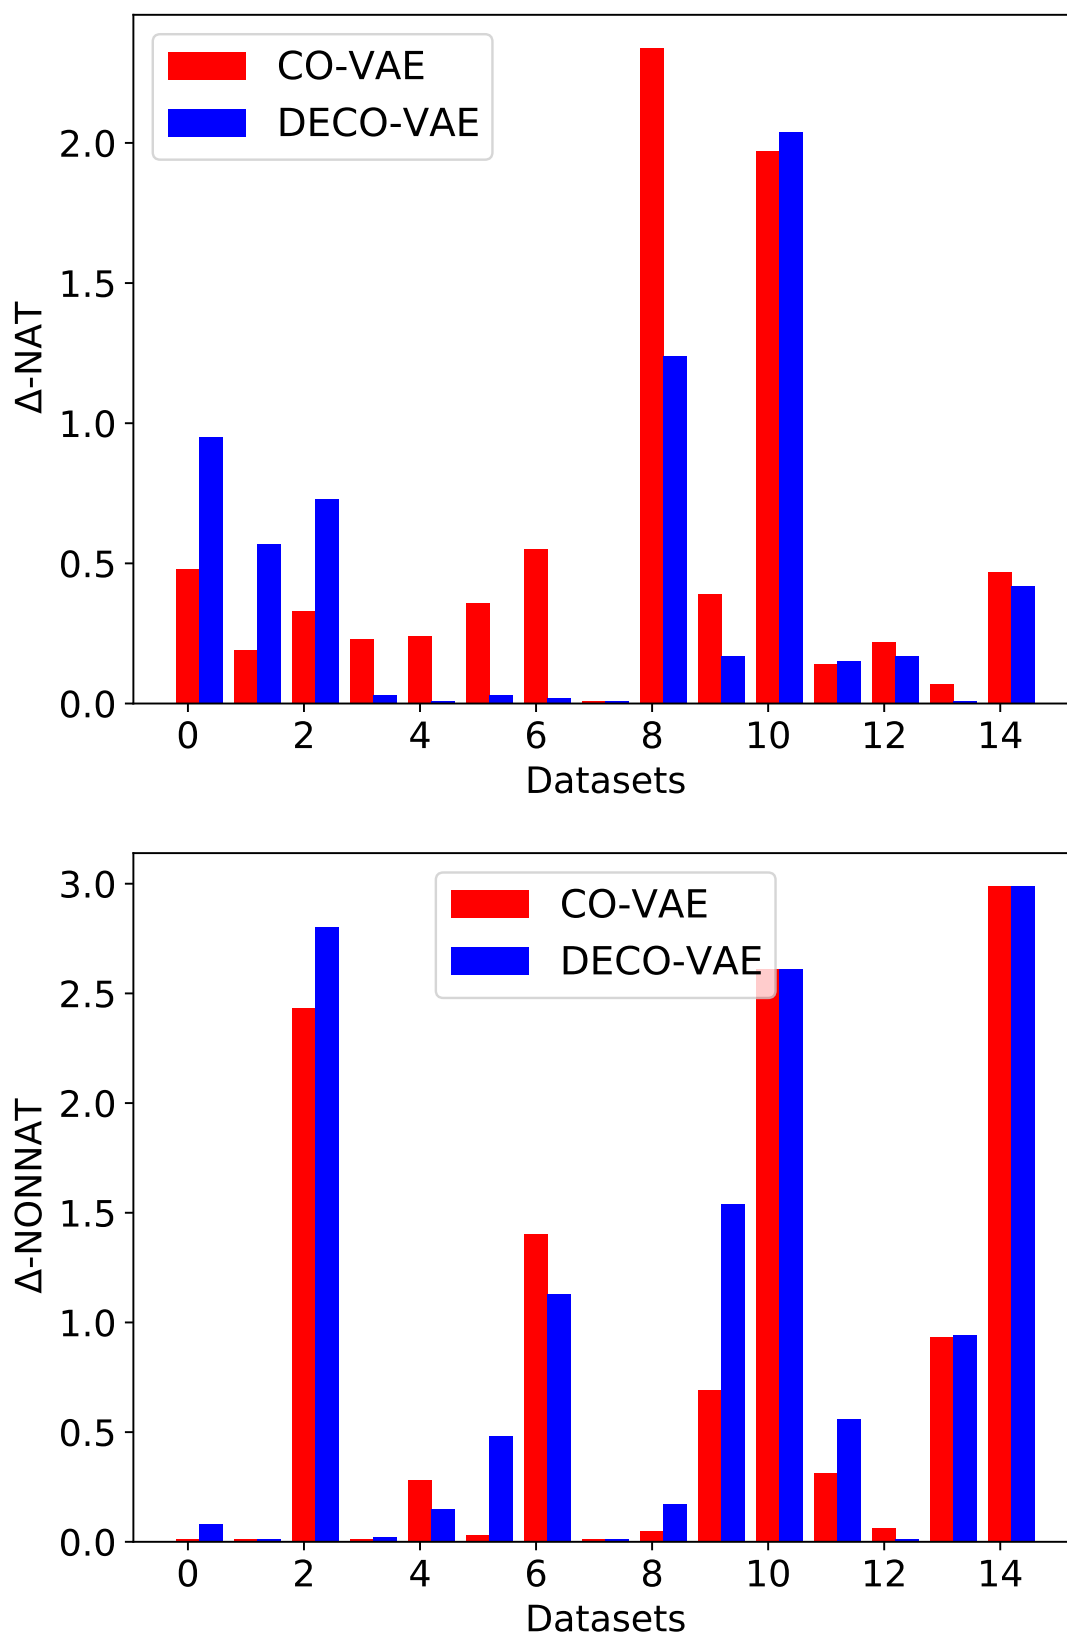

Fig. 5. Comparison of the  $\langle\text{NAT-C}\rangle$  and  $\langle\text{NONNAT-C}\rangle$  values, respectively, over contact graphs generated by CO-VAE and DECO-VAE to those in the training dataset, reporting the difference ( $\delta$ ).

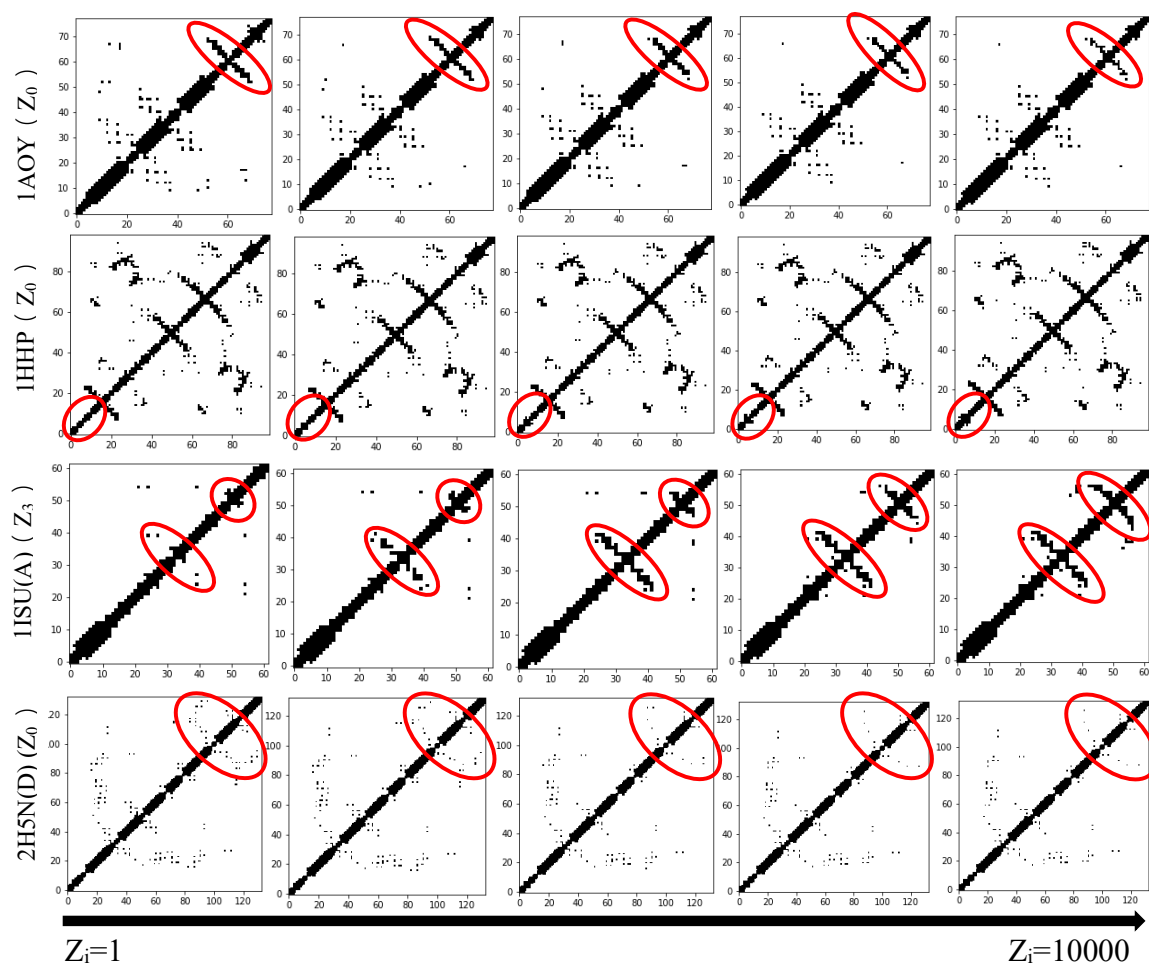

**Fig. 6.** Generated contact graphs for four more selected protein targets (with native PDB ids 1AOY, 1HHP, 1ISU(A), and 2H5N(D)). For each, one of the semantic factors discovered in the latent variables is varied as above to visualize changes in contacts.

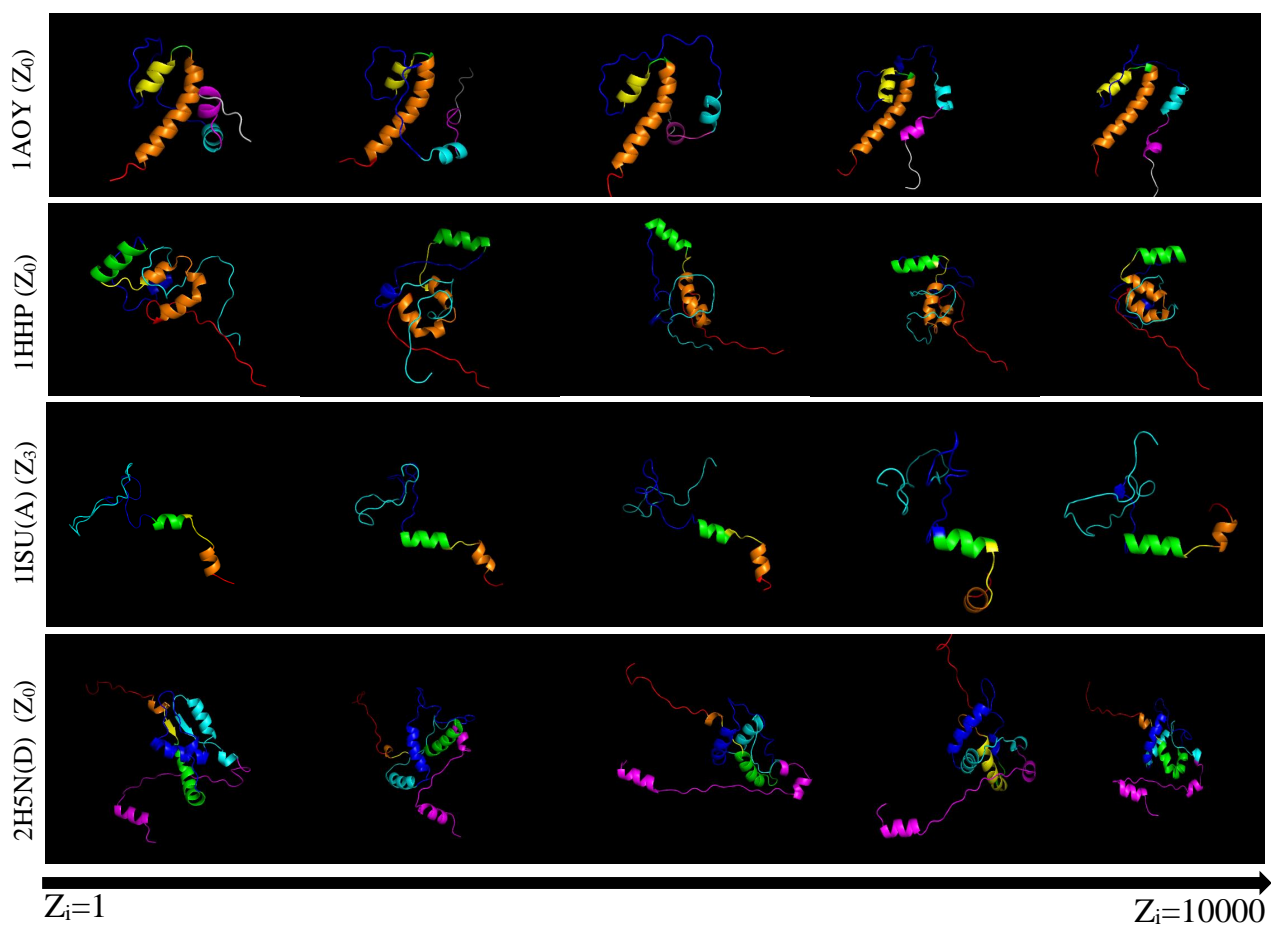

Fig. 7. Tertiary protein structures corresponding to the contact graphs related in Fig 6. Secondary structures are drawn in different colors.
